# Supplementary material for: Use of a Chagas Urine Nanoparticle Test (Chunap) to Correlate with Parasitemia Levels in T. cruzi/HIV Co-infected Patients
Source: PubMed Central journal article supplement (PMC4768913; doi:10.1371/journal.pntd.0004407), 2016-02-26
Supplement: pntd.0004407.s002.pdf [file pntd.0004407.s002.pdf]

## STARD checklist

### " Use of a Chagas Urine Nanoparticle Test (Chunap) to Correlate with Parasitemia Levels in *T.cruzi*/HIV Co-Infected Patients"

| Section & Topic                 | No  | Item                                                                                                                                                   |
|---------------------------------|-----|--------------------------------------------------------------------------------------------------------------------------------------------------------|
| <b>TITLE OR ABSTRACT</b>        |     |                                                                                                                                                        |
| p: 1, 4                         | 1   | Identification as a study of diagnostic accuracy using at least one measure of accuracy (such as sensitivity, specificity, predictive values, or AUC)  |
| <b>ABSTRACT</b>                 |     |                                                                                                                                                        |
| p: 4                            | 2   | Structured summary of study design, methods, results, and conclusions (for specific guidance, see STARD for Abstracts)                                 |
| <b>INTRODUCTION</b>             |     |                                                                                                                                                        |
| p: 7-10                         | 3   | Scientific and clinical background, including the intended use and clinical role of the index test                                                     |
| p: 10                           | 4   | Study objectives and hypotheses                                                                                                                        |
| <b>METHODS</b>                  |     |                                                                                                                                                        |
| <i>Study design</i><br>p: 11    | 5   | Whether data collection was planned before the index test and reference standard were performed (prospective study) or after (retrospective study)     |
| <i>Participants</i> p: 11-12    | 6   | Eligibility criteria                                                                                                                                   |
| p: 11-12                        | 7   | On what basis potentially eligible participants were identified (such as symptoms, results from previous tests, inclusion in registry)                 |
| p: 11-12                        | 8   | Where and when potentially eligible participants were identified (setting, location and dates)                                                         |
| p: 11-12                        | 9   | Whether participants formed a consecutive, random or convenience series                                                                                |
| <i>Test methods</i>             | 10a | Index test, in sufficient detail to allow replication                                                                                                  |
| p: 13-16                        | 10b | Reference standard, in sufficient detail to allow replication                                                                                          |
| p: 13-16                        | 11  | Rationale for choosing the reference standard (if alternatives exist)                                                                                  |
| p: 13-16                        | 12a | Definition of and rationale for test positivity cut-offs or result categories of the index test, distinguishing pre-specified from exploratory         |
| p: 13-16                        | 12b | Definition of and rationale for test positivity cut-offs or result categories of the reference standard, distinguishing pre-specified from exploratory |
| p: 13-16                        | 13a | Whether clinical information and reference standard results were available to the performers/readers of the index test                                 |
| p: 13-16                        | 13b | Whether clinical information and index test results were available to the assessors of the reference standard                                          |
| <i>Analysis</i> p: 16           | 14  | Methods for estimating or comparing measures of diagnostic accuracy                                                                                    |
| p: 16                           | 15  | How indeterminate index test or reference standard results were handled                                                                                |
| p: 16                           | 16  | How missing data on the index test and reference standard were handled                                                                                 |
| p: 16                           | 17  | Any analyses of variability in diagnostic accuracy, distinguishing pre-specified from exploratory                                                      |
| p: 11                           | 18  | Intended sample size and how it was determined                                                                                                         |
| <b>RESULTS</b>                  |     |                                                                                                                                                        |
| <i>Participants</i>             | 19  | Flow of participants, using a diagram                                                                                                                  |
| p: 17-18                        | 20  | Baseline demographic and clinical characteristics of participants                                                                                      |
| p: 17-18                        | 21a | Distribution of severity of disease in those with the target condition                                                                                 |
| p: 17-18                        | 21b | Distribution of alternative diagnoses in those without the target condition                                                                            |
| p: 17-18                        | 22  | Time interval and any clinical interventions between index test and reference standard                                                                 |
| <i>Test results</i><br>p: 19-28 | 23  | Cross tabulation of the index test results (or their distribution) by the results of the reference standard                                            |
| p: 19-28                        | 24  | Estimates of diagnostic accuracy and their precision (such as 95% confidence intervals)                                                                |
| p: 19-28                        | 25  | Any adverse events from performing the index test or the reference standard                                                                            |
| <b>DISCUSSION</b>               |     |                                                                                                                                                        |
| p: 30-33                        | 26  | Study limitations, including sources of potential bias, statistical uncertainty, and generalisability                                                  |
| p: 30-33                        | 27  | Implications for practice, including the intended use and clinical role of the index test                                                              |
| <b>OTHER INFORMATION</b>        |     |                                                                                                                                                        |
|                                 | 28  | Registration number and name of registry                                                                                                               |
|                                 | 29  | Where the full study protocol can be accessed                                                                                                          |
|                                 | 30  | Sources of funding and other support; role of funders                                                                                                  |
